# Supplementary material for: A Patient-Specific Foot Model for the Estimate of Ankle Joint Forces in Patients with Juvenile Idiopathic Arthritis
Source: PubMed Central journal article supplement (PMC4690839; doi:10.1007/s10439-015-1451-z), 2015-09-15
Supplement: 10439_2015_1451_MOESM1_ESM.pdf [file 10439_2015_1451_MOESM1_ESM.pdf]

## Landmarks for the registration of the generic model onto the patient-specific model

Table 1: Landmarks for the pelvis and the femur.

| <b>Pelvis</b>                                 | <b>Femur</b>                                                                |
|-----------------------------------------------|-----------------------------------------------------------------------------|
| Right ASIS                                    | Superior and posterior point on greater trochanter                          |
| Left ASIS                                     | Centre of femoral head (sphere fit)                                         |
| Right PSIS                                    | Apotheosis of lesser trochanter                                             |
| Left PSIS                                     | Centre of the greater trochanter                                            |
| Centre of the right femoral head (sphere fit) | Lateral and medial epicondyle apex                                          |
| Centre of the left femoral head (sphere fit)  | Most distal point of medial and lateral condyle                             |
|                                               | Anterolateral and Anteromedial ridge of the patellar surface groove         |
|                                               | Cylinder with centre (cent_cylinder) at mid-point of FCH and avg(FMC & FLC) |
|                                               | Height 0.02 and positioned to encompass femoral shaft                       |
|                                               | Superior and inferior central point on cent_cylinder                        |

Table 2: Landmarks for the shank and patella.

| <b>Tibia</b>                                        | <b>Fibula</b>                                                     | <b>Patella</b>                               |
|-----------------------------------------------------|-------------------------------------------------------------------|----------------------------------------------|
| Apotheosis of tibial tuberosity                     | Distal apex of fibula                                             | Apex of inferior patella                     |
| Lateral and medial ridge of tibial plateau          | Proximal apex of fibula                                           | Centre of medial and lateral edge            |
| Distal apex of tibia (by medial malleolus)          | Cylinder with centre at mid-point of FAL and FAX                  | Centre of patella anterior face              |
| Posteriorlateral corner of distal tibia             | Height 0.02 and positioned to encompass fibula shaft              | Centre of superiorposterior ridge of patella |
| Most anterior portion of centre of distal tibia     | Most lateral point on cent_cylinder (relative to the tibia shaft) |                                              |
| Mid-point of inter-condylar tubercles               | Most medial point on cent_cylinder (relative to the tibia shaft)  |                                              |
| Cylinder with centre at mid-point of top and TAM    |                                                                   |                                              |
| Height 0.02 and positioned to encompass tibia shaft |                                                                   |                                              |
| Point at the centre of cent_cylinder                |                                                                   |                                              |

Table 3: Landmarks for the foot (used also for MRI registration).

| <b>Hindfoot</b>                                                                     | <b>Talus</b>                                                         | <b>Metatarsals</b>                                                     | <b>Toes</b>                                                           |
|-------------------------------------------------------------------------------------|----------------------------------------------------------------------|------------------------------------------------------------------------|-----------------------------------------------------------------------|
| Sustentaculum tali (most medial point)                                              | Centre of articulating surface of the tibio-talar joint              | Apex of proximal 5th met                                               | Distal point of each of the distal phalanges and the hallux           |
| Apex of posterior calcaneous                                                        | Apex of the inferior lateral process                                 | Superior distal head of each metatarsal bone                           | Superior, inferior and medial point on proximal hallux head           |
| Navicular (big medial bone) tuberosity (mid-point of medial side)                   | Apex of the anteriomedial tuberosity                                 | Centre of proximal articular surface of the first four metatarsal bone | Superior and inferior point on proximal 2nd, 3rd and 4th phalanx head |
| Greater apophysis of calcaneous (most superior anterior point)                      | Most posterior point on the talus                                    | Inferior distal head of each metatarsal bone                           | Superior, inferior and lateral point on proximal 5th phalanx head     |
| Peroneal trochlea (prominence opposite STL)                                         | Apex of the superior ridge through the centre of the lateral process |                                                                        |                                                                       |
| Most inferior point on calcaneous (on floor)                                        | Inferior posteriomedial corner of the talus                          |                                                                        |                                                                       |
| Posteriorinferior corner (2nd most inferior) of cuboid (lateral bone)               |                                                                      |                                                                        |                                                                       |
| Anteriorinferior corner of cuboid                                                   |                                                                      |                                                                        |                                                                       |
| Point on tuberosity at the inferioranterior calcaneous (most inferior and anterior) |                                                                      |                                                                        |                                                                       |
| Most anterior point on hindfoot (superior too)                                      |                                                                      |                                                                        |                                                                       |
